# Supplementary material
Source: Springer Nature journal article supplement (https://www.springermedizin.de/resource/supplementary/12985_2014_2480_MOESM5_ESM.pdf/9606828)

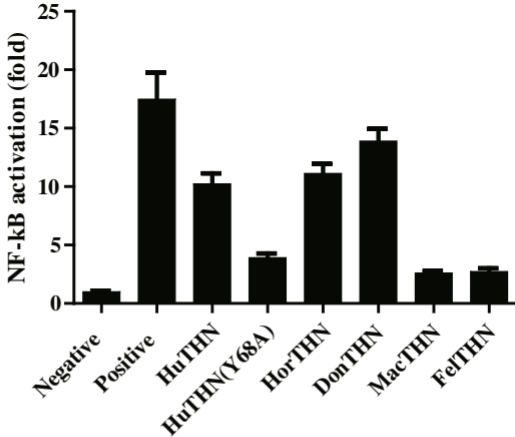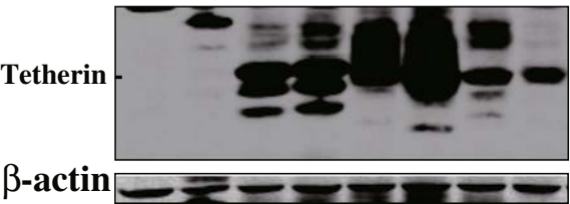

Supplement: MOESM5 [file 9606828]
